# Supplementary material
Source: PubMed Central journal article supplement (PMC2997468)
Supplement: NIHMS240575-supplement-OidaSupplementaryFigures.pdf [file NIHMS240575-supplement-OidaSupplementaryFigures.pdf]

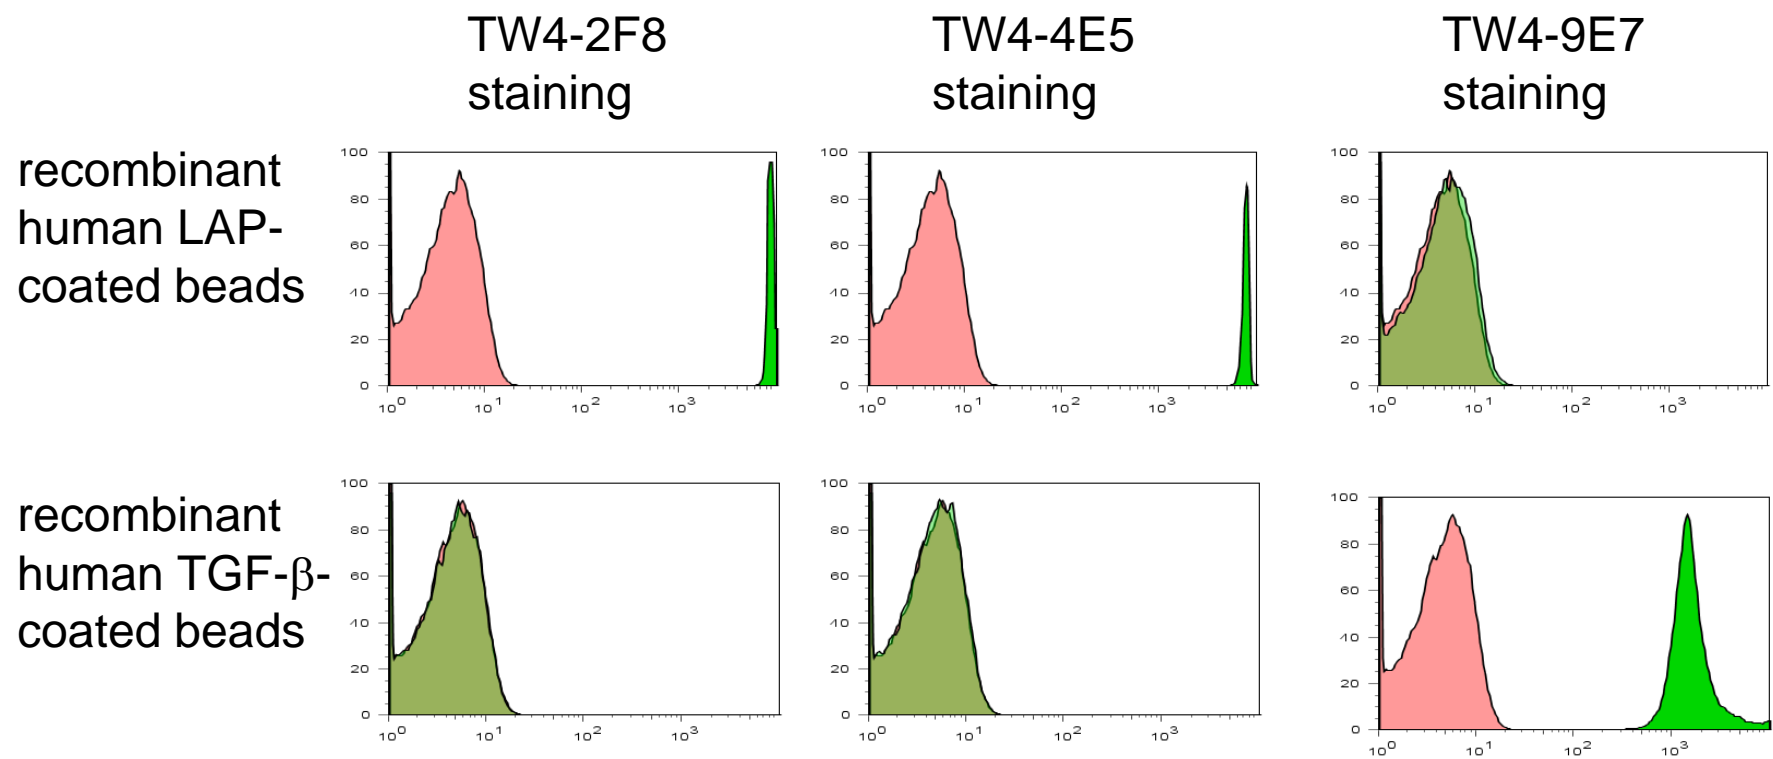

Supplemental Fig. S1

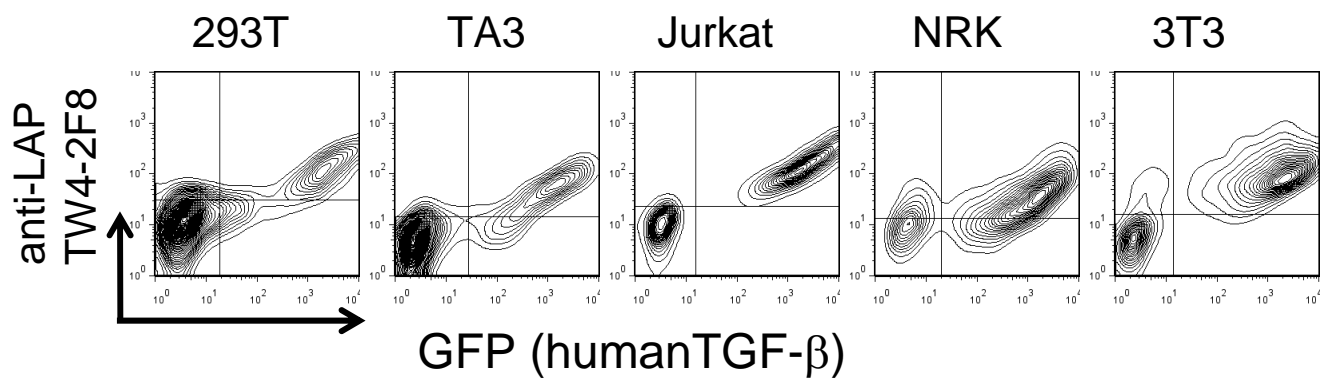

Supplemental Fig. S2

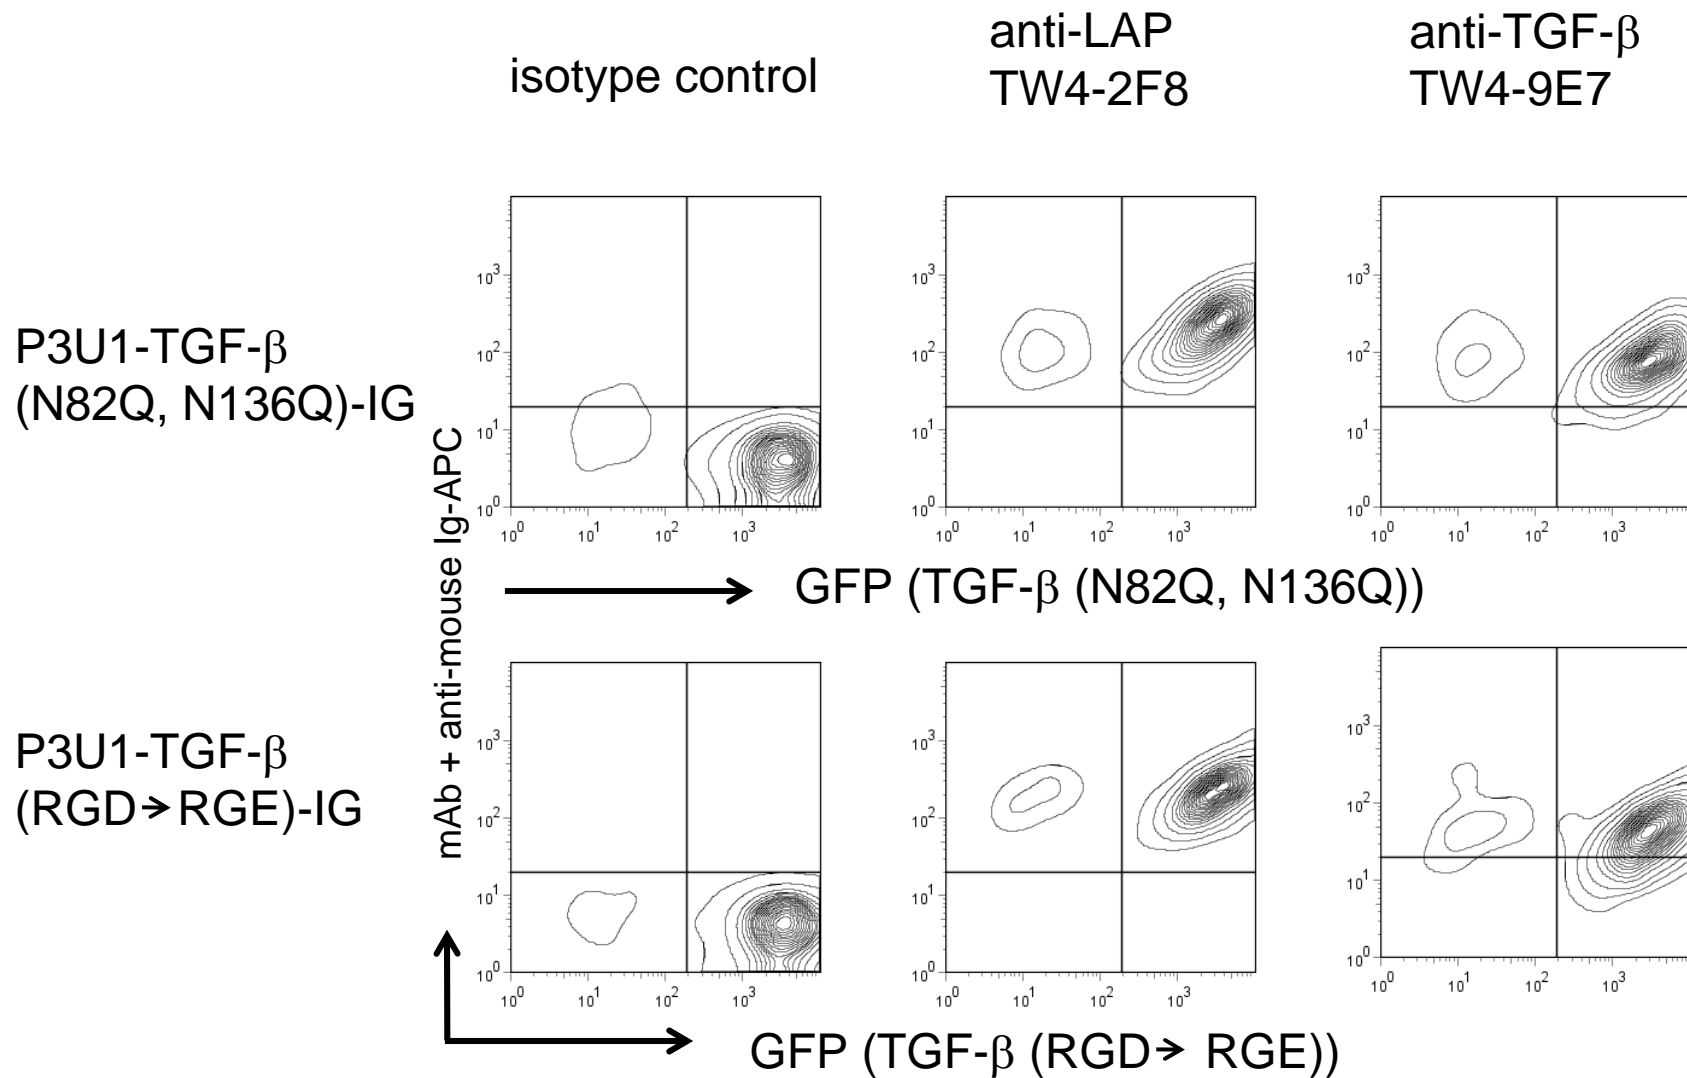

Supplemental Fig. S3

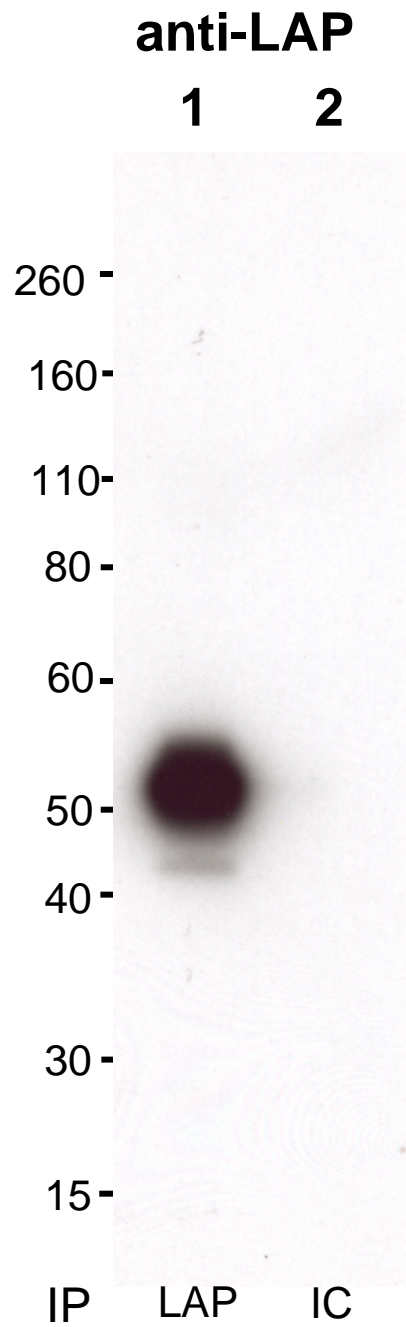

Supplemental Fig. S4

**A**

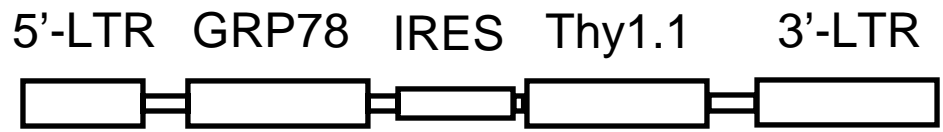

**B**

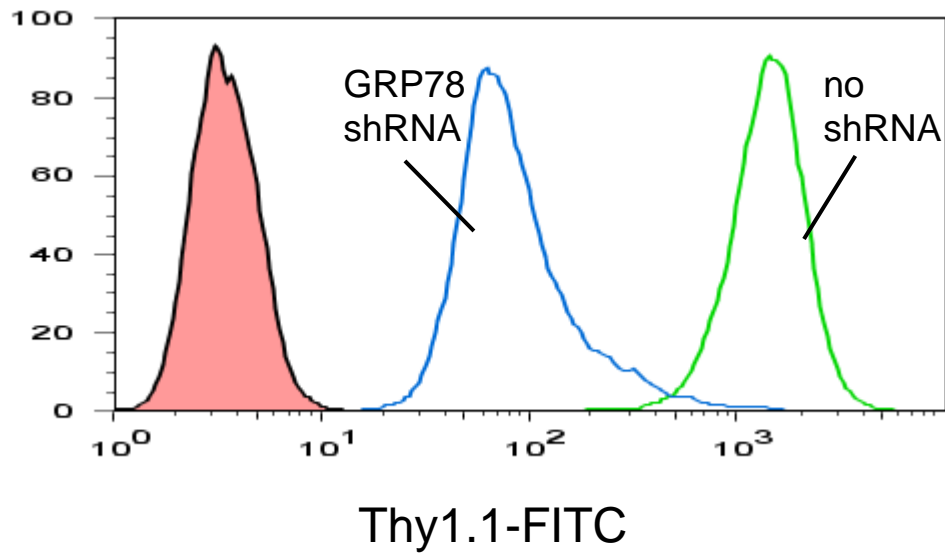

Supplemental Fig. S5
